# Supplementary material
Source: PubMed Central journal article supplement (PMC3398202)
Supplement: NIHMS368219-supplement-1_si_001.pdf [file NIHMS368219-supplement-1_si_001.pdf]

# **Supporting Information**

for

## Conformational Sampling of Peptides in the Presence of Protein Crowders from AA/CG- Multiscale Simulations

*Alexander V. Predeus<sup>1</sup>, Seref Gul<sup>2</sup>, Srinivasa M. Gopal<sup>1</sup>, and Michael Feig<sup>1,2\*</sup>*

<sup>1</sup>Department of Biochemistry & Molecular Biology and <sup>2</sup>Department of Chemistry, Michigan  
State University, East Lansing, MI, 48824, United States

**Figure S1:** Crystals of protein-protein complexes composed of two proteins (chains A and B) were obtained from the PDB data base (see PDB ID on individual figures). Four types of structures were generated: all-atom chains A and B (red curves), all-atom A and PRIMO B (green curves), PRIMO A and all-atom B (blue curves), PRIMO chains A and B (purple curves). Chain B was then translated along the axis connecting centers of mass of chains A and B to distances ranging from -1 to +15 Å, and system total energies with GBMV implicit solvent were calculated.

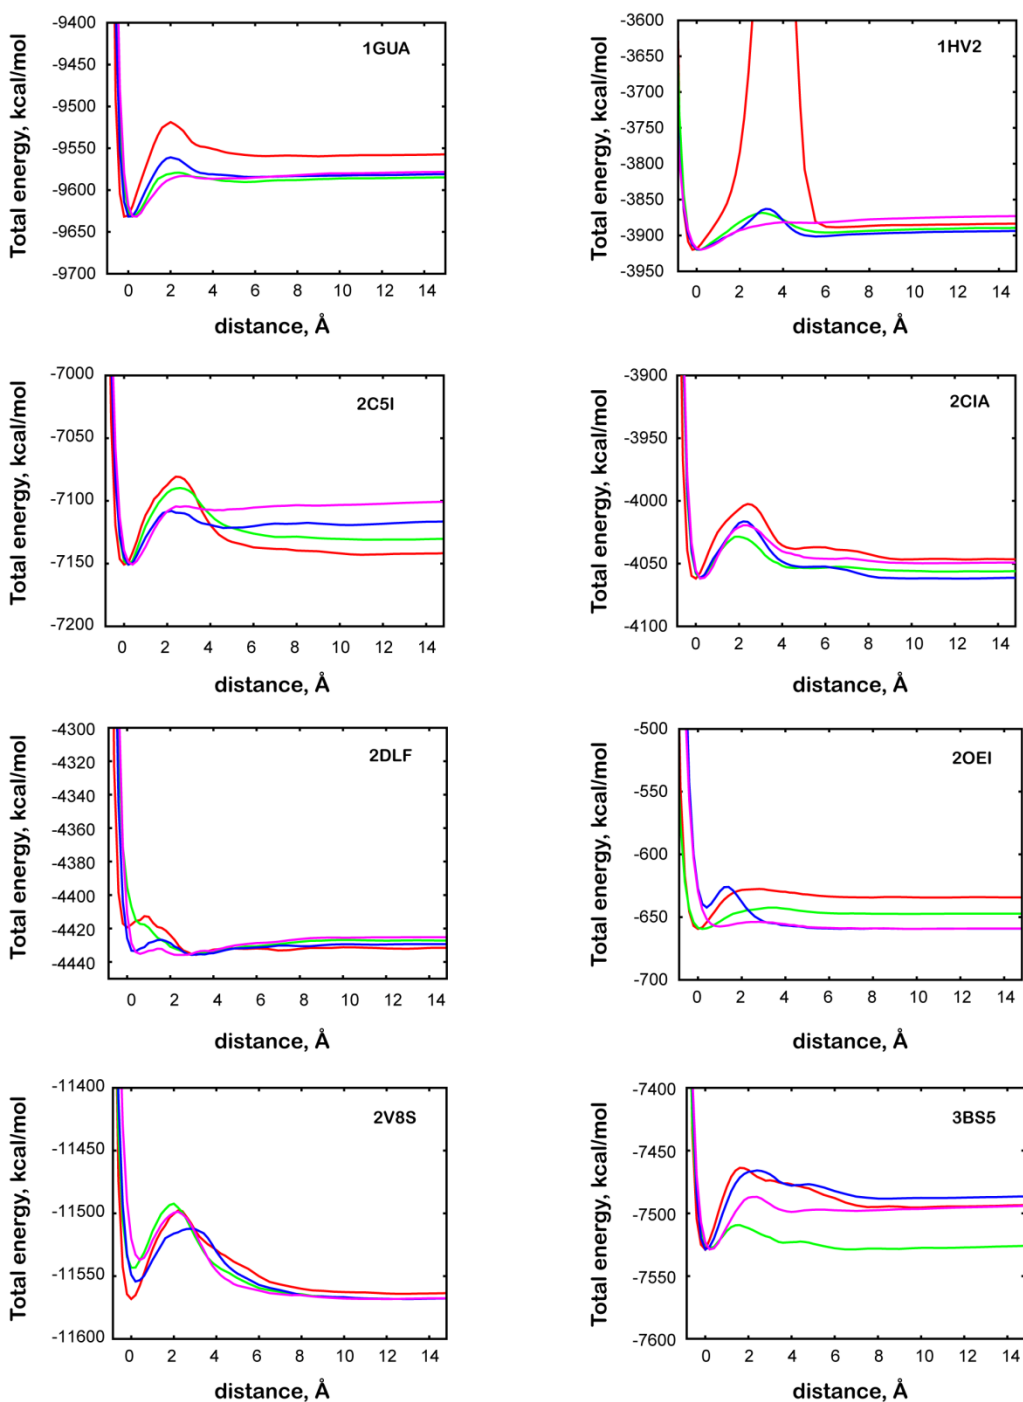

**Figure S2:** The graph of  $state_i$  function, as well as its first and second derivatives, depending on the distance between a pair of residues  $d_i$ . Cutoff of 8.0 Å is used in this illustration.

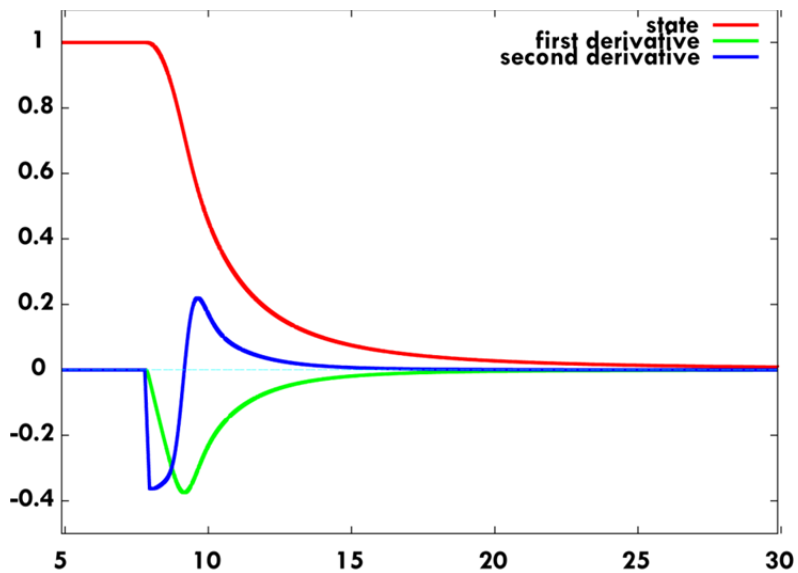

**Table S1:** Block averaged cluster populations of trp-cage during three simulation intervals

| $\epsilon$ | time      | Cluster 1 | Cluster 2 | Cluster 3 | Cluster 4 | Cluster 5 | Cluster 6 | Cluster 7 | Cluster 8 |
|------------|-----------|-----------|-----------|-----------|-----------|-----------|-----------|-----------|-----------|
| 5          | 10-40 ns  | 0.0       | 30.0      | 0.1       | 22.8      | 47.1      | 0.0       | 0.0       | 0.0       |
|            | 40-70 ns  | 0.0       | 81.0      | 3.4       | 8.2       | 7.4       | 0.0       | 0.0       | 0.0       |
|            | 70-100 ns | 0.0       | 78.1      | 0.4       | 10.7      | 10.8      | 0.0       | 0.0       | 0.0       |
| 20         | 10-40 ns  | 16.8      | 57.0      | 6.4       | 15.7      | 3.4       | 0.0       | 0.0       | 0.0       |
|            | 40-70 ns  | 15.6      | 14.1      | 10.8      | 55.1      | 3.9       | 0.0       | 0.0       | 0.0       |
|            | 70-100 ns | 6.7       | 50.9      | 5.4       | 32.7      | 4.2       | 0.0       | 0.0       | 0.0       |
| 40         | 10-40 ns  | 57.1      | 3.5       | 35.9      | 1.1       | 0.1       | 0.0       | 0.0       | 0.0       |
|            | 40-70 ns  | 71.8      | 1.4       | 18.6      | 1.5       | 0.2       | 0.0       | 0.0       | 0.0       |
|            | 70-100 ns | 47.0      | 7.6       | 37.1      | 3.4       | 0.4       | 0.0       | 0.1       | 0.0       |
| 80         | 10-40 ns  | 47.7      | 2.9       | 39.8      | 1.1       | 0.0       | 0.0       | 0.7       | 0.0       |
|            | 40-70 ns  | 58.8      | 1.0       | 32.5      | 2.7       | 0.0       | 0.0       | 0.4       | 0.0       |
|            | 70-100 ns | 55.2      | 4.2       | 24.5      | 1.5       | 0.0       | 0.0       | 0.0       | 0.0       |
| multi      | 5-10 ns   | 33.0      | 14.3      | 28.4      | 4.5       | 0.0       | 9.6       | 5.6       | 2.7       |
|            | 10-15 ns  | 21.2      | 14.5      | 42.4      | 11.7      | 0.0       | 3.7       | 3.7       | 2.8       |
|            | 15-20 ns  | 11.4      | 19.3      | 36.6      | 16.7      | 1.3       | 4.8       | 5.8       | 4.0       |

**Table S2:** Block averaged cluster populations of melittin during three simulation intervals

| $\epsilon$ | time       | Cluster 1 | Cluster 2 | Cluster 3 | Cluster 4 | Cluster 5 | Cluster 6 | Cluster 7 |
|------------|------------|-----------|-----------|-----------|-----------|-----------|-----------|-----------|
| 5          | 7.5-30 ns  | 90.1      | 0.0       | 9.9       | 0.0       | 0.0       | 0.0       | 0.0       |
|            | 30-52.5 ns | 89.8      | 0.0       | 9.2       | 0.0       | 0.0       | 0.0       | 0.0       |
|            | 52.5-75 ns | 85.6      | 0.0       | 10.8      | 0.0       | 0.0       | 0.0       | 0.0       |
| 20         | 7.5-30 ns  | 58.9      | 17.3      | 11.3      | 3.5       | 7.7       | 0.0       | 0.0       |
|            | 30-52.5 ns | 28.6      | 27.6      | 6.6       | 7.3       | 29.7      | 0.1       | 0.0       |
|            | 52.5-75 ns | 29.4      | 34.0      | 7.5       | 12.3      | 16.5      | 0.0       | 0.0       |
| 40         | 7.5-30 ns  | 37.9      | 32.0      | 10.8      | 7.4       | 0.2       | 0.3       | 0.0       |
|            | 30-52.5 ns | 32.6      | 28.1      | 9.6       | 12.4      | 0.1       | 0.0       | 0.0       |
|            | 52.5-75 ns | 23.6      | 51.4      | 8.1       | 11.3      | 0.0       | 0.4       | 0.0       |
| 80         | 7.5-30 ns  | 15.4      | 55.7      | 4.5       | 9.9       | 0.3       | 0.1       | 0.0       |
|            | 30-52.5 ns | 0.5       | 68.2      | 0.1       | 13.3      | 0.0       | 0.0       | 0.0       |
|            | 52.5-75 ns | 0.0       | 85.0      | 0.0       | 9.5       | 4.7       | 0.0       | 0.0       |
| multi      | 5-10 ns    | 57.7      | 6.4       | 4.4       | 0.0       | 0.0       | 16.8      | 9.6       |
|            | 10-15 ns   | 52.7      | 11.4      | 13.6      | 0.0       | 0.0       | 13.2      | 2.2       |
|            | 15-20 ns   | 37.4      | 11.8      | 22.0      | 0.0       | 0.0       | 13.3      | 2.0       |

**Table S3.** Contacts found in melittin's native conformation obtain through CHARMM's DMAT facility. Left to right, residue 1 number, residue 1 name, residue 2 number, residue 2 name, and distance between centers of geometry of side chain's heavy atoms in Å. For GLY, C<sub>α</sub> was used as a side chain.

|    |     |    |     |          |
|----|-----|----|-----|----------|
| 4  | ALA | 1  | GLY | 3.632038 |
| 5  | VAL | 4  | ALA | 5.849712 |
| 7  | LYS | 4  | ALA | 5.587463 |
| 8  | VAL | 4  | ALA | 6.339722 |
| 8  | VAL | 5  | VAL | 6.054344 |
| 9  | LEU | 5  | VAL | 5.681451 |
| 9  | LEU | 8  | VAL | 6.498944 |
| 10 | THR | 6  | LEU | 4.997338 |
| 10 | THR | 9  | LEU | 6.265362 |
| 11 | THR | 10 | THR | 5.467035 |
| 13 | LEU | 8  | VAL | 4.829834 |
| 13 | LEU | 9  | LEU | 6.37523  |
| 14 | PRO | 11 | THR | 6.444817 |
| 14 | PRO | 13 | LEU | 5.932506 |
| 15 | ALA | 14 | PRO | 6.053349 |
| 16 | LEU | 13 | LEU | 6.183247 |
| 17 | ILE | 13 | LEU | 6.289258 |
| 17 | ILE | 14 | PRO | 5.878261 |
| 17 | ILE | 16 | LEU | 6.462913 |
| 18 | SER | 15 | ALA | 6.000315 |
| 19 | TRP | 16 | LEU | 5.688582 |
| 20 | ILE | 16 | LEU | 5.975275 |
| 20 | ILE | 17 | ILE | 5.547878 |
| 20 | ILE | 19 | TRP | 6.305514 |
| 21 | LYS | 17 | ILE | 6.373267 |
| 21 | LYS | 18 | SER | 5.289639 |
| 22 | ARG | 18 | SER | 5.114005 |
| 23 | LYS | 19 | TRP | 4.586513 |
| 24 | ARG | 21 | LYS | 6.21103  |
| 26 | GLN | 23 | LYS | 5.966605 |

**Table S4.** Contacts found in trp-cage native conformation. Left to right, residue 1 number, residue 1 name, residue 2 number, residue 2 name, and distance between centers of geometry of side chain's heavy atoms in Å. For GLY, C<sub>α</sub> was used as a side chain.

|    |     |    |     |          |
|----|-----|----|-----|----------|
| 3  | TYR | 2  | LEU | 5.751879 |
| 6  | TRP | 3  | TYR | 6.098105 |
| 7  | LEU | 3  | TYR | 5.940856 |
| 7  | LEU | 6  | TRP | 5.360793 |
| 8  | LYS | 5  | GLN | 5.252648 |
| 9  | ASP | 8  | LYS | 3.798363 |
| 12 | PRO | 6  | TRP | 5.184951 |
| 13 | SER | 12 | PRO | 5.626726 |
| 14 | SER | 9  | ASP | 5.17474  |
| 16 | ARG | 9  | ASP | 4.362751 |
| 16 | ARG | 14 | SER | 4.3398   |
| 18 | PRO | 6  | TRP | 4.918295 |
| 18 | PRO | 12 | PRO | 6.40614  |
| 18 | PRO | 17 | PRO | 5.862235 |
| 19 | PRO | 2  | LEU | 4.732281 |
| 19 | PRO | 3  | TYR | 5.138424 |
| 19 | PRO | 6  | TRP | 4.659135 |
| 19 | PRO | 18 | PRO | 5.669231 |

### **Definition of the coordinate based on the fraction of native contacts**

The coordinate is based on the definition used in Sheinerman, F.B.; Brooks, C. L. *J. Mol Biol.*, **1998**, 278, 439-456. The definition was modified to allow for more continuous switching, which in turn makes the resulting population more evenly distributed (the use of original definition resulted in ladder-like energy profiles due to relatively small number of native contacts).

The coordinate ( $\rho$ ) is defined as follows:

$$\rho = \frac{\sum_{i=1}^N w_i (1 - state_i)}{\sum_{i=1}^N w_i} \quad (S1)$$

The coordinate is based on a map of contacts between N pairs of residues. In the definition that we use in this work, a pair of residues is in contact if the distance between centers of geometry of residues' side chains (heavy atom only) is less than 6.5 Å. Since the reference state can be generated not only from a single snapshot but from a dynamic trajectory, every contact's abundance is accounted for by its weight  $w_i$  that is based on the probability of this contact (e.g. if in a 1000 frame trajectory the contact appears 700 times, it's weight would be 0.7). If we use a single structure, as in this work,  $w_i = 1.0$  for all contacts.

Every contact is then described by a state switch function, that is equal to  $\sim 1$  everywhere within a cutoff distance (in our case, 6.5 Å), and then is gradually switched to zero on longer distances. The exact form of this function is given in Equation S2:

$$state_i = \begin{cases} 1, & \text{if } d_i - cutoff < -0.1 \\ 1 - \frac{c_1}{3c_2} (d_i - cutoff + 0.1)^3, & \text{if } -0.1 \leq d_i - cutoff \leq 0.066090 \\ \frac{1}{c_2} \left( \frac{1}{1+c_3(d_i-cutoff+5)^{20}} + \frac{25}{5+(d_i-cutoff)^2} \right), & \text{if } d_i - cutoff > 0.066090 \end{cases} \quad (S2)$$

The function is of class C2, with a smooth first and a continuous second derivative (see Figure S2). Coefficients are  $C_1 = 6.5147216196$ ,  $C_2 = 5.9933363671$ , and  $C_3 = 1.0e-16$ .
